# Supplementary material
Source: HighWire-hosted journal article supplement (doi:10.1101/rna.080367.124)
Supplement: SupplementalTableS1.xlsx [file SupplementalTableS1.xlsx]

## Sheet: Canonical Combined
		CHARMM36 (kcal/mol)		Amber ff14SB (kcal/mol)		Experiment (kcal/mol)			Error (kcal/mol)
	Sequence	Abs. ∆G	σ	Abs. ∆G	σ	Abs. ∆G	σ		CHARMM	AMBER
hPUM1	UGUACAUC	-11.5726	0.654347	-10.9714	0.651127	-10.675	0.269		-0.897597	-0.296375
	UGUAAAUC	-11.3326	0.177609	-10.9894	0.205529	-10.8	0.369		-0.532597	-0.189375
	UGUAUAUC	-11.1696	0.17853	-11.0784	0.165303	-10.931	0.27		-0.238597	-0.147375
	UGUACCUC	-8.1386	0.282214	-7.60237	0.297311	-9.132	0.472		0.993403	1.52963
	UGUACGUC	-7.8136	0.166337	-9.70738	0.26414	-8.882	0.826		1.0684	-0.825375
	UGUACUUC	-7.5356	0.393554	-7.29037	0.338497	-9.027	0.601		1.4914	1.73663
	UGUACAAC	-10.4836	0.177553	-9.80837	0.159028	-9.485	0.339		-0.998597	-0.323375
	UGUACACC	-10.8846	0.202425	-10.5454	0.237413	-9.325	0.446		-1.5596	-1.22037
	UGUACAGC	-9.9476	0.173358	-10.8854	0.263547	-11.421	0.269		1.4734	0.535625
							hPUM1:		CHARMM	Amber
								MUE	1.028	0.756
								RMSE	1.11	0.947
								Pearson R	0.69	0.74
hPUM2	UGUAUAUA	-13.5498	0.952524	-13.4152	0.991158	-13.2333	0.35836		-0.31646	-0.181889
	AGUAUAUA	-12.4578	0.119887	-11.1002	0.153561	-10.484	0.407294		-1.97379	-0.616219
	CGUAUAUA	-12.6508	0.101533	-10.6892	0.254566	-10.96	0.238		-1.69079	0.270781
	GGUAUAUA	-11.9298	0.233122	-10.4022	0.456355	-10.16	0.254		-1.76979	-0.242219
	UAUAUAUA	-10.3748	0.14686	-11.2242	0.166208	-11.6272	0.460721		1.25239	0.402961
	UCUAUAUA	-9.63979	0.214972	-10.8802	0.193352	-10.456	0.2		0.81621	-0.424219
	UUUAUAUA	-10.5698	0.181574	-10.8052	0.236516	-10.717	0.312		0.14721	-0.0882187
	UGCAUAUA	-13.0088	0.114769	-10.7292	0.0943398	-11.041	0.253		-1.96779	0.311781
	UGUCUAUA	-11.1218	0.437517	-12.1152	0.137931	-11.731	0.198		0.60921	-0.384219
	UGUGUAUA	-11.4538	0.306544	-11.5722	0.11908	-12.193	0.222		0.73921	0.620781
	UGUUUAUA	-10.8308	0.136418	-11.4862	0.248676	-11.83	0.197		0.99921	0.343781
	UGUAAAUA	-13.5278	0.208038	-13.6992	0.281233	-13.5101	0.15714		-0.0177068	-0.189135
	UGUACAUA	-12.6048	0.160112	-12.7992	0.12744	-13.287	0.198		0.68221	0.487781
	UGUAUCUA	-10.9128	0.0906973	-10.9932	0.0713442	-11.55	0.206		0.63721	0.556781
	UGUAUGUA	-10.7718	0.140929	-12.3232	0.164478	-11.702	0.203		0.93021	-0.621219
	UGUAUUUA	-11.4148	0.234617	-11.2472	0.138798	-11.778	0.215		0.36321	0.530781
	UGUAUAAA	-12.6008	0.107056	-13.0262	0.178059	-12.113	0.195		-0.48779	-0.913219
	UGUAUACA	-12.5878	0.114634	-12.9932	0.066888	-11.105	0.195		-1.48279	-1.88822
	UGUAUAUC	-11.1078	0.138924	-11.8962	0.174416	-11.936	0.206		0.82821	0.0397813
	UGUAUAUG	-11.4368	0.18918	-11.0152	0.219584	-12.062	0.205		0.62521	1.04678
	UGUAUAUU	-11.4678	0.155322	-11.6082	0.133195	-12.545	0.211		1.07721	0.936781
							hPUM2:		CHARMM	Amber
								MUE	0.924	0.528
								RMSE	1.082	0.664
								Pearson R	0.39	0.75
							hPUM1 and hPUM2:		CHARMM	Amber
								MUE	0.95558	0.596722
								RMSE	1.09047	0.760087
								Pearson R	0.686127	0.837464
