# Supplementary material
Source: HighWire-hosted journal article supplement (doi:10.1101/rna.080367.124)
Supplement: SupplementalTableS2.xlsx [file SupplementalTableS2.xlsx]

## Sheet: CHARMM36m Combined
Table S2: Relative binding free energies (∆∆G kcal/mol) for hPUM1 RNA modification screening.
Modification	Patch Name	Site 1 (U)	Site 2 (G)	Site 3 (U)	Site 4 (A)	Site 5 (C)	Site 6 (A)	Site 7 (U)	Site 8 (A*)
A	ADE	0.440 ± 0.196	1.598 ± 0.378	1.572 ± 0.300	0.095 ± 0.210	0.240 ± 0.178	0.055 ± 0.187	1.089 ± 0.178	0.029 ± 0.211
m2A	2MA	1.632 ± 0.159	n.s. ± n.s.	2.782 ± 0.233	0.910 ± 0.133	1.108 ± 0.215	1.361 ± 0.263	2.541 ± 0.522	0.660 ± 0.207
m6A	6MA	n.s. ± n.s.	n.s. ± n.s.	n.s. ± n.s.	1.628 ± 0.198	0.997 ± 0.182	2.440 ± 0.175	n.s. ± n.s.	2.307 ± 0.217
m62A	M6A	n.s. ± n.s.	n.s. ± n.s.	n.s. ± n.s.	n.s. ± n.s.	n.s. ± n.s.	n.s. ± n.s.	n.s. ± n.s.	n.s. ± n.s.
m8A	8MA	1.469 ± 0.343	n.s. ± n.s.	1.428 ± 0.230	-0.328 ± 0.284	2.029 ± 0.141	2.420 ± 0.328	0.280 ± 0.125	2.284 ± 0.324
m1I	1MI	0.052 ± 0.211	4.224 ± 0.307	1.868 ± 0.213	1.346 ± 0.257	1.520 ± 0.148	2.597 ± 0.385	1.460 ± 0.421	2.921 ± 0.154
I	INO	0.392 ± 0.076	n.s. ± n.s.	0.370 ± 0.650	1.375 ± 0.293	1.170 ± 0.204	3.165 ± 0.229	1.614 ± 0.251	3.055 ± 0.251
ms2m6A	SMA	0.595 ± 0.113	2.072 ± 0.325	n.s. ± n.s.	-2.946 ± 0.243	0.626 ± 0.252	-0.452 ± 0.663	1.811 ± 0.237	0.123 ± 0.320
ac6A	6AA	-0.262 ± 0.214	5.934 ± 0.577	1.559 ± 0.188	0.236 ± 0.308	1.077 ± 0.240	2.676 ± 0.350	2.075 ± 0.115	2.351 ± 0.226
i6A	6IA	n.s. ± 0.109	3.582 ± 0.180	n.s. ± n.s.	0.741 ± 0.308	0.437 ± 0.138	3.225 ± 0.169	0.761 ± 0.197	n.s. ± n.s.
ms2i6A	MIA	n.s. ± 0.154	0.928 ± 0.266	5.283 ± 0.478	-3.108 ± 0.234	1.318 ± 0.223	1.076 ± 0.265	1.339 ± 0.306	n.s. ± n.s.
ms2io6A	SIA	n.s. ± n.s.	n.s. ± n.s.	n.s. ± n.s.	-3.167 ± 0.276	1.414 ± 0.477	0.580 ± 0.247	n.s. ± n.s.	n.s. ± n.s.
io6A	HIA	n.s. ± 0.119	4.327 ± 0.310	0.802 ± 2.624	0.699 ± 0.466	0.616 ± 0.192	3.512 ± 0.195	0.498 ± 0.184	n.s. ± n.s.
G	GUA	1.985 ± 0.182	-0.162 ± 0.444	1.996 ± 0.334	3.270 ± 0.126	1.458 ± 0.150	3.759 ± 0.166	1.625 ± 0.173	4.162 ± 0.250
m1G	1MG	1.197 ± 0.162	4.207 ± 0.083	3.076 ± 0.286	-0.067 ± 0.200	0.604 ± 0.107	3.638 ± 0.181	1.271 ± 0.215	2.620 ± 0.362
m2G	2MG	1.443 ± 0.170	-0.303 ± 0.213	4.199 ± 0.126	0.402 ± 0.305	0.720 ± 0.229	n.s. ± n.s.	2.068 ± 0.242	3.030 ± 0.198
m22G	M2G	1.313 ± 0.138	2.691 ± 0.213	3.505 ± 0.204	0.068 ± 0.329	0.603 ± 0.184	4.197 ± 0.305	1.675 ± 0.314	2.141 ± 0.382
preQ0	DCG	1.492 ± 0.136	0.526 ± 0.653	3.044 ± 0.245	0.773 ± 0.263	1.080 ± 0.183	3.268 ± 0.752	1.371 ± 0.279	2.859 ± 0.240
imG-14	DWG	1.495 ± 0.451	7.847 ± 2.012	1.322 ± 0.348	1.754 ± 0.263	1.386 ± 0.752	2.924 ± 1.677	1.268 ± 0.422	2.774 ± 0.232
imG	IMG	1.328 ± 0.400	9.875 ± 0.295	3.301 ± 0.330	0.204 ± 0.262	0.503 ± 0.306	3.440 ± 0.344	0.075 ± 0.293	1.975 ± 0.417
imG2	IWG	1.745 ± 0.185	8.200 ± 2.351	1.173 ± 0.312	1.758 ± 0.244	1.630 ± 0.596	2.881 ± 1.294	1.274 ± 0.397	2.709 ± 0.170
mimG	MWG	2.371 ± 0.351	n.s. ± n.s.	3.461 ± 0.258	1.031 ± 0.238	0.817 ± 0.590	n.s. ± n.s.	2.630 ± 0.685	0.756 ± 0.654
U	URA	0.081 ± 0.335	1.400 ± 0.129	0.021 ± 0.373	2.052 ± 0.192	0.403 ± 0.179	3.521 ± 0.387	-0.015 ± 0.146	2.993 ± 0.274
D	H2U	1.425 ± 0.136	n.s. ± n.s.	0.196 ± 0.218	3.069 ± 0.145	0.726 ± 0.331	3.700 ± 0.161	2.304 ± 0.226	2.720 ± 0.181
mo5U	MOU	-0.822 ± 0.940	n.s. ± n.s.	0.229 ± 0.194	1.195 ± 0.241	0.473 ± 0.138	2.733 ± 0.272	0.267 ± 0.177	2.778 ± 0.203
m5s2U	52U	0.530 ± 0.637	n.s. ± n.s.	1.708 ± 0.383	1.458 ± 0.298	0.544 ± 0.159	1.696 ± 0.803	1.120 ± 0.358	2.599 ± 0.314
m5D	MDU	1.352 ± 0.270	n.s. ± n.s.	0.158 ± 0.240	3.130 ± 0.217	0.781 ± 0.182	3.819 ± 0.196	2.511 ± 0.225	2.898 ± 0.217
Ψ	PSU	0.559 ± 0.327	4.499 ± 0.226	0.674 ± 0.154	2.542 ± 0.180	0.283 ± 0.152	4.233 ± 0.215	0.899 ± 0.284	1.969 ± 0.219
m3Ψ	3MP	1.401 ± 0.056	4.920 ± 0.119	1.305 ± 0.157	2.169 ± 0.141	0.496 ± 0.162	2.523 ± 0.223	0.727 ± 0.201	1.556 ± 0.113
m3U	3MU	0.868 ± 0.044	3.642 ± 0.153	0.740 ± 0.061	0.525 ± 0.126	-0.254 ± 0.103	1.617 ± 0.169	0.987 ± 0.148	0.923 ± 0.274
s4U	4SU	0.933 ± 0.239	2.848 ± 0.554	1.436 ± 0.299	1.795 ± 0.168	0.248 ± 0.074	4.095 ± 0.159	0.419 ± 0.254	0.947 ± 0.249
m5U	5MU	-0.213 ± 0.153	2.703 ± 0.131	0.499 ± 0.260	1.897 ± 0.171	-0.117 ± 0.087	2.623 ± 0.192	-0.278 ± 0.194	3.089 ± 0.080
ho5U	5HU	-0.712 ± 0.140	2.683 ± 0.239	0.316 ± 0.177	1.023 ± 0.270	-0.550 ± 0.253	2.711 ± 0.099	0.400 ± 0.094	3.305 ± 0.071
s2U	2SU	0.356 ± 0.460	2.359 ± 0.213	1.448 ± 0.266	1.643 ± 0.292	-0.290 ± 0.246	3.439 ± 0.501	0.532 ± 0.118	2.479 ± 0.112
m1Ψ	1MP	0.509 ± 0.166	3.165 ± 0.340	2.582 ± 0.359	2.089 ± 0.150	0.302 ± 0.247	3.141 ± 0.174	1.239 ± 0.197	3.422 ± 0.164
cnm5U	CYU	-0.457 ± 0.166	n.s. ± n.s.	-0.358 ± 0.381	0.227 ± 0.175	0.419 ± 0.124	2.566 ± 0.266	0.288 ± 0.118	2.183 ± 0.207
mcm5s2U	70U	0.769 ± 0.190	n.s. ± n.s.	1.160 ± 0.205	-0.238 ± 0.503	0.091 ± 0.138	1.951 ± 0.676	0.979 ± 0.398	2.296 ± 0.225
mchm5U	CMU	-1.053 ± 0.126	3.857 ± 0.278	-0.013 ± 0.139	0.586 ± 0.167	0.454 ± 0.118	2.556 ± 0.188	1.569 ± 0.095	2.760 ± 0.160
ncm5U	BCU	-0.767 ± 0.129	3.668 ± 0.203	0.040 ± 0.100	0.470 ± 0.128	-1.669 ± 0.210	1.958 ± 0.224	0.883 ± 0.113	2.566 ± 0.153
mcm5U	OCU	-0.694 ± 0.164	3.637 ± 0.252	-0.641 ± 0.281	1.363 ± 0.359	-0.273 ± 0.110	n.s. ± n.s.	0.459 ± 0.099	2.383 ± 0.252
mcmo5U	OEU	-0.758 ± 0.142	2.427 ± 0.271	0.246 ± 0.358	1.789 ± 0.697	1.108 ± 0.351	n.s. ± n.s.	1.282 ± 0.272	2.074 ± 0.510
C	CYT	1.139 ± 0.125	2.194 ± 0.192	1.002 ± 0.186	1.595 ± 0.205	-0.036 ± 0.097	3.434 ± 0.282	0.688 ± 0.202	3.453 ± 0.295
m5C	5MC	-0.045 ± 0.073	4.564 ± 0.082	1.693 ± 0.075	-0.202 ± 0.095	-0.038 ± 0.088	2.701 ± 0.149	1.837 ± 0.099	2.298 ± 0.100
ac4C	4AC	n.s. ± n.s.	n.s. ± n.s.	n.s. ± n.s.	n.s. ± n.s.	n.s. ± n.s.	n.s. ± n.s.	n.s. ± n.s.	n.s. ± n.s.
m4C	4MC	0.041 ± 0.094	4.703 ± 0.187	1.645 ± 0.200	0.296 ± 0.121	0.001 ± 0.110	2.747 ± 0.103	2.059 ± 0.294	2.429 ± 0.145
f5C	5FC	0.147 ± 0.077	3.654 ± 0.204	1.904 ± 0.151	-0.647 ± 0.157	-0.067 ± 0.271	2.616 ± 0.338	2.370 ± 0.140	2.025 ± 0.094
hm5C	HMC	-0.210 ± 0.088	4.588 ± 0.083	1.999 ± 0.171	1.336 ± 0.217	-1.054 ± 0.187	2.757 ± 0.076	2.299 ± 0.134	2.431 ± 0.142
s2C	2SC	1.527 ± 0.301	2.593 ± 0.310	1.057 ± 0.247	2.074 ± 0.088	-0.779 ± 0.121	3.259 ± 0.194	0.168 ± 0.197	2.934 ± 0.160
"Patch Name" = 3-letter name assigned by Xu et al. (2016), n.s. = not specified due to poor sampling
Modifications with ∆∆G ≤ -0.7 kcal/mol in bold italics.
* The Site 8 screen used a UGUAUAUA oligo (PDB ID: 3q0n) whereas sites 1-7 used UGUACAUC (PDB ID: 3q0p)
