# Supplementary material
Source: HighWire-hosted journal article supplement (doi:10.1101/rna.080367.124)
Supplement: SupplementalTableS3.xlsx [file SupplementalTableS3.xlsx]

## Sheet: Combined
		CHARMM36 (kcal/mol)		Amber modrna08 (kcal/mol)		Experiment (kcal/mol)			Error (kcal/mol)
	Sequence	∆G	σ	∆G	σ	∆G	σ		CHARMM	AMBER
Ψ	CCUGUAAAUA	-13.4015	0.234968	-12.2042	0.319074	-12.5098	0.0448327		-0.891781	-0.305552
	CCΨGUAAAUA	-12.9755	0.0943663	-12.0052	0.0326497	-12.1811	0.0257301		-0.794389	-0.175944
	CCUGΨAAAUA	-12.2225	0.132004	-13.1372	0.270379	-12.0239	0.118358		-0.19863	1.1133
	CCUGUAAAΨA	-11.9225	0.169941	-11.9782	0.166244	-11.916	0.0657546		-0.00652652	0.0621932
m6A	CCUGUAUAUA	-15.0943	0.215448	-14.0217	0.291264	-13.1599	0		-1.93444	0.861777
	CCUGUAUAUA	-13.3373	0.166012	-13.3027	0.151476	-13.061	0.0455224		-0.276305	0.241639
	CCUGUAUAUA	-13.2043	0.0815414	-12.4357	0.230645	-12.5965	0.0311469		-0.607835	-0.160832
	CCUGUAUAUA	-12.6513	0.110494	-13.4547	0.0932363	-12.5467	0.257716		-0.104594	0.907928
PUM modRNAs	UGUACAAU	-10.621	0.383059	-11.3562	0.359771	-10.6912	0.116455		0.0702167	0.66495
	UGU-SMA-CAAU	-13.142	0.228064	-10.2962	0.161697	-9.89667	0.203316		-3.24534	0.399511
	UGUA-4SU-AAU	-10.562	0.128082	-10.0112	0.159625	-10.2311	0.302248		-0.330935	-0.219898
	UGUA-5MC-AAU	-10.891	0.0735731	-10.7062	0.134302	-10.631	0.130137		-0.260024	0.0751905
	UGUA-dHMC-AAU	-11.125	0.197396	-10.6082	0.0940479	-10.2482	0.13368		-0.876816	0.359982
	UGUAC-6IA-AU	-6.76701	0.0988989	-9.95118	0.16772	-10.6526	0.112471		3.88556	-0.701389
	UGUACA-6IA-U	-9.80101	0.155425	-10.7152	0.150987	-10.4692	0.136583		0.66816	0.246006
									CHARMM	Amber
								MUE	0.943437	0.433073
								RMSE	1.4763	0.538931
								Pearson R	0.668533	0.92883
