# Supplementary material
Source: HighWire-hosted journal article supplement (doi:10.1101/rna.080367.124)
Supplement: SupplementalTableS4.xlsx [file SupplementalTableS4.xlsx]

## Sheet: Sheet1
Group 1	m5C (5MC)	m4C (4MC)	f5C (5FC)	hm5C (HMC)
Group 2	C (CYT)	A (ADE)	hm5C (HMC)	s2C (2SC)
Group 3	D (H2U)	mo5U (MOU)	m5s2U (52U)	m5D (MDU)
Group 4	Ψ (PSU)	m3Ψ (3MP)	m3U (3MU)	s4U (4SU)
Group 5	m5U (5MU)	ho5U (5HU)	s2U (2SU)	m1Ψ (1MP)
Group 6	C (CYU)	mcm5s2U (70U)	mchm5U (CMU)	ncm5U (BCU)
Group 7	mchm5U (CMU)	ncm5U (BCU)	mcm5U (OCU)	mcmo5U (OEU)
Group 8	m1G (1MG)	m2G (2MG)	m22G (M2G)	preQ0 (DCG)
Group 9	imG-14 (DWG)	imG (IMG)	imG2 (IWG)	mimG (MWG)
Group 10	G (GUA)	m2A (2MA)	m6A (6MA)	m8A (8MA)
Group 11	m1I (1MI)	I (INO)	ms2m6A (SMA)	ac6A (6AA)
Group 12	i6A (6IA)	ms2i6A (MIA)	ms2io6A (SIA)	io6A (HIA)
Group 13	A (ADE)	C (CYT)	G (GUA)	U (URA)
Syntax: Modified Base Name (CHARMM Patch Name)
